# Supplementary material for: So You Want Me to Believe You’re Happy or Angry? How Negotiators Perceive and Respond to Emotion Deception
Source: Springer Nature journal article supplement (doi:10.1007/s10726-023-09850-0), 2023-08-03
Supplement: MOESM1 [file 25885496]

**Supplementary Materials**

Article title: So You Want Me to Believe You’re Happy or Angry? How Negotiators Perceive and Respond to Emotion Deception

**Journal name:** Group Decision & Negotiation

**Experiment 1**

**Underlying Motivations**

Perceived relationship-focused motivation was assessed by asking “To what extent do you think your supervisor tried to maintain a good relationship with you when he communicated to you that he was angry (happy)?”. Perceived company-interested motivation was assessed by “To what extent do you think your supervisor acted in the interest of the company when he communicated to you that he was angry (happy)?” (1 = *not at all*, 7 = *very much*)*.* For means and standard deviations for the perceived relationship-focused and company-interested motivations see Table S1. As a main focus of the current research is how negotiators differently perceive and respond to opponents who use the two different types of emotion deception (i.e., experiencing anger but communicating happiness versus experiencing happiness but communicating anger), we also present the contrasts (in post hoc analyses) between the two deceptive conditions in the absence of significant interaction effects.

***Perceived Relationship-focused Motivation***

The 2 × 2 ANOVA on perceived relationship-focused motivation yielded a main effect of experienced emotion, *F*(1, 140) = 5.72, *p* = .018, ηp2= .11. Participants perceived that the supervisor who experienced happiness (*M* = 4.65, *SD* = 2.11) tried more to maintain a good relationship with them than the supervisor who experienced anger (*M* = 3.64, *SD* = 2.02). Also, the main effect of communicated emotion was significant, *F*(1, 140)= 155.17, *p* < .001, ηp2 = .52. Participants perceived that the supervisor who communicated happiness (*M* = 5.51, *SD* = 1.36) tried more to maintain a good relationship with them than the supervisor who communicated anger (*M* = 2.43, *SD* = 1.57). The interaction was not significant, *F*(1, 140) = 1.26, *p* = .264, ηp2 = .01. Post hoc analyses did show that participants perceived the supervisor who experienced anger but communicated happiness as having a higher relationship-focused motivation than the supervisor who experienced happiness but communicated anger, *t*(140) = 6.67, *p* < .001.

***Perceived Company-interested Motivation***

The 2 × 2 ANOVA on perceived company-interested motivation yielded a main effect of experienced emotion, *F*(1, 140) = 23.47, *p* < .001, ηp2= .19. Participants perceived that the supervisor who experienced happiness (*M* = 4.91, *SD* = 1.77) acted more in the interest of the company than the supervisor who experienced anger (*M* = 3.34, *SD* = 1.76). We also found the main effect of communicated emotion, *F*(1, 140)= 22.65, *p* < .001, ηp2= .13. Participants perceived that the supervisor who communicated happiness (*M* = 4.75, *SD* = 1.81) acted more in the interest of the company than the supervisor who communicated anger (*M* = 3.28, *SD* = 1.76). The interaction was not significant, *F*(1, 140) = 2.77, *p* = .098, ηp2= .02. Post hoc analyses showed that participants did not perceive the supervisor who experienced anger but communicated happiness as having a different company-interest motivation than the employee who experienced happiness but communicated anger, *t*(140) = 0.06, *p* = .955.

| **Table S1**  Means and Standard Deviations (SD) for Perceived Relationship-focused and Company-interested Motivations as a Function of Experienced Emotion and Communicated Emotion in Experiment 1 | | | | |
| --- | --- | --- | --- | --- |
|  | **Experienced emotion** | | | |
|  | Happiness | | Anger | |
|  | **Communicated emotion** | | | |
|  | Happiness  *M*(*SD*) | Anger  *M*(*SD*) | Happiness  *M*(*SD*) | Anger  *M*(*SD*) |
| Supervisor’s perceived relationship-focused motivation | 5.90 (1.20) | 2.62 (1.60) | 5.05 (1.39) | 2.31 (1.56) |
| Supervisor’s perceived company-interested motivation | 5.60 (1.25) | 3.81(1.94) | 3.78(1.87) | 2.92(1.56) |

**Experiment 2**

**Underlying Motivations**

Measures of perceived relationship-focused and self-interested motivations were similar to those used in Experiment 1, with the role of opponent being switched from the supervisor to the employee. For means and standard deviations for the perceived relationship-focused and self-interested motivations see Table S2.

***Perceived Relationship-focused Motivation***

The 2 × 2 ANOVA on perceived relationship-focused motivation yielded a main effect of experienced emotion, *F*(1, 172) = 4.98, *p* = .027, ηp2 = .02. Participants perceived that the employee who experienced anger (*M* = 4.24, *SD* = 2.04) tried more to maintain a good relationship with them than the employee who experienced happiness (*M* = 3.88, *SD* = 2.14). In addition, the main effect ofcommunicated emotion was significant, *F*(1, 170)= 216.46, *p* < .001, ηp2 = .56. Participants perceived that the employee who communicated happiness (*M* = 5.60, *SD* = 1.46) tried more to maintain a good relationship with them than the employee who communicated anger (*M* = 2.51, *SD*= 1.37). Their interaction was not significant, *F*(1, 172) = 1.48, *p* = .226, ηp2 = .01. Post hoc analyses showed that participants perceived the employee who experienced anger but communicated happiness as having a higher relationship-focused motivation than the employee who experienced happiness but communicated anger, *t*(172) = 11.78, *p* < .001.

***Perceived Self-interested Motivation***

The 2 × 2 ANOVA on perceived self-interested motivation yielded a main effect of experienced emotion, *F*(1, 172) = 19.48, *p* < .001, ηp2 = .09. Participants perceived that the employee who experienced happiness (*M* = 5.44, *SD*= 1.50) acted more in the interest of himself than the employee who experienced anger (*M* = 4.48, *SD*= 1.99). The main effect of communicated emotion was significant, *F*(1, 172)= 56.13, *p* < .001, ηp2 = .24. Participants perceived that the employee who communicated anger (*M* = 5.81, *SD*= 1.57) acted more in the interest of himself than the employee who communicated happiness (*M* = 4.12, *SD*= 1.66). The interaction between experienced emotionand communicated emotion was significant, *F*(1, 172) = 3.91, *p* = .049, ηp2 = .02. In line with the main effect of communicated emotions, simple effect tests showed that participants perceived the employee as acting more in the interest of himself when he communicated being angry than when he communicated being happy, *F*s > 15.38, *p*s< .001, ηp2s> .08; regardless of whether he actually experienced happiness or anger. Moreover, post hoc analyses showed that participants perceived the employee who experienced happiness but communicated anger as acting more in the interest of himself than the employee who experienced anger but communicated happiness, *t*(172) = 8.28, *p* < .001.

| **Table S2**  Means and Standard Deviations (SD) for Perceived Relationship-focused and Self-interested Motivations as A Function of Experienced Emotion and Communicated Emotion in Experiment 2 | | | | |
| --- | --- | --- | --- | --- |
|  | **Experienced emotion** | | | |
|  | Happiness | | Anger | |
|  | **Communicated emotion** | | | |
|  | Happiness  *M*(*SD*) | Anger  *M*(*SD*) | Happiness  *M*(*SD*) | Anger  *M*(*SD*) |
| Employee’s perceived Employee’s relationship-focused motivation | 5.50(1.49) | 2.14(1.12) | 5.71(1.44) | 2.87(1.50) |
| Employee’s perceived self-interested motivation | 4.83(1.34) | 6.09(1.39) | 3.36(1.65) | 5.53(1.69) |

**Experiment 3**

**Underlying Motivations**

Measures of perceived relationship-focused and self-interested motivations were similar to those used in Experiments 1 and 2. For means and standard deviations for the perceived relationship-focused and self-interested motivations see Table S3.

***Perceived Relationship-focused Motivation***

The 2 × 2 ANOVA on perceived relationship-focused motivation yielded a main effect of experienced emotion, *F*(1, 176) = 39.32, *p* < .001, ηp2 = .18. Participants perceived the employee who experienced anger (*M* = 4.94, *SD* = 2.05) as trying more to maintain a good relationship with them than the employee who experienced happiness (*M* = 3.71, *SD* = 1.92). In addition, the main effect of communicated emotion was significant, *F*(1, 176) = 208.14, *p* < .001, ηp2 = .54. Participants perceived the employee who communicated happiness (*M* = 5.76, *SD* = 1.49) as trying more to maintain a good relationship with them than the employee who communicated anger (*M* = 2.86, *SD*= 1.48). The interaction was not significant, *F*(1, 172) = 0.81, *p* = .368, ηp2 = .00. Post hoc analyses showed that participants perceived the employee who experienced anger but communicated happiness as having a higher relationship-focused motivation than the employee who experienced happiness but communicated anger, *t*(176) = 14.56, *p* < .001.

***Perceived Self-interested Motivation***

The 2 × 2 ANOVA on perceived self-interested motivation yielded a main effect of experienced emotion, *F*(1, 176) = 32.83, *p* < .001, ηp2 = .15. Participants perceived that the employee who experienced happiness (*M* = 5.57, *SD*= 1.53) acted more in the interest of himself than the employee who experienced anger (*M* = 4.38, *SD*= 2.06). The main effect of communicated emotion was significant, *F*(1, 176) = 111.27, *p* < .001, ηp2 = .39. Participants perceived that the employee who communicated anger (*M* = 6.09, *SD*= 1.17) acted more in the interest of himself than the employee who communicated happiness (*M* = 3.88, *SD*= 1.85). The interaction between experienced emotion and communicated emotion was significant, *F*(1, 176) = 5.33, *p* = .022, ηp2 = .03. In line with the main effect of communicated emotions, simple effect tests showed that participants perceived the employee as acting more in the interest of himself when he communicated being angry than when he communicated being happy, *F*s > 33.93, *p*s< .001, ηp2s> .16; regardless of whether he actually experienced happiness or anger. Moreover, post hoc analyses showed that participants perceived the employee who experienced happiness but communicated anger as acting more in the interest of himself than the employee who experienced anger but communicated happiness, *t*(176) = 11.45, *p* < .001.

**Perceived Emotion Intensity**

We explored whether participants may perceive the employee as experiencing different intensities of happiness (anger), depending on the emotion (happiness versus anger) the employee communicated. Perceived emotion intensity was measured by the item “The employee truly felt happy (angry). How intense do you think this feeling was?” from 1 = *not happy (angry) at all* to 7 = *extremely happy (angry)*.

The 2 × 2 ANOVA on perceived emotion intensity yielded a main effect of experienced emotion, *F*(1, 176) = 4.83, *p* = .029, ηp2 = .03. The main effect of communicated emotion was not significant, *F*(1, 176) = 0.00, *p* = .936, ηp2 = .00. The interaction between experienced emotion and communicated emotion was significant, *F*(1, 176) = 27.71, *p* < .001, ηp2 = .14. Simple effect tests showed that participants perceived the employee who experienced anger, as experiencing more intense anger when he communicated being angry than when he communicated being happy, *F*(1, 176) = 14.28, *p* < .001, ηp2 = .08. Also, participants perceived the employee who experienced happiness, as experiencing more intense happiness when he communicated being happy than when he communicated being angry, *F*(1, 176) = 13.43, *p* < .001, ηp2 = .07.

| **Table S3**  Means and Standard Deviations (SD) for Perceived Relationship-focused and Self-interested Motivations and Perceived Intensity as A Function of Experienced Emotion and Communicated Emotion in Experiment 3 | | | | |
| --- | --- | --- | --- | --- |
|  | **Experienced emotion** | | | |
|  | Happiness | | Anger | |
|  | **Communicated emotion** | | | |
|  | Happiness  *M*(*SD*) | Anger  *M*(*SD*) | Happiness  *M*(*SD*) | Anger  *M*(*SD*) |
| Employee’s perceived relationship-focused motivation | 5.04(1.65) | 2.32(0.96) | 6.49(0.82) | 3.40(1.72) |
| Employee’s perceived self-interested motivation | 4.71(1.64) | 6.45(0.66) | 3.02(1.66) | 5.73(1.44) |
| Employee’s perceived emotion intensity | 6.33(0.63) | 5.64(0.89) | 5.33(1.22) | 6.04(0.70) |
